# Supplementary material for: Drugs modulating stochastic gene expression affect the erythroid differentiation process
Source: PLOS journal article supplement (doi:10.1371/journal.pone.0225166), 2019-11-21

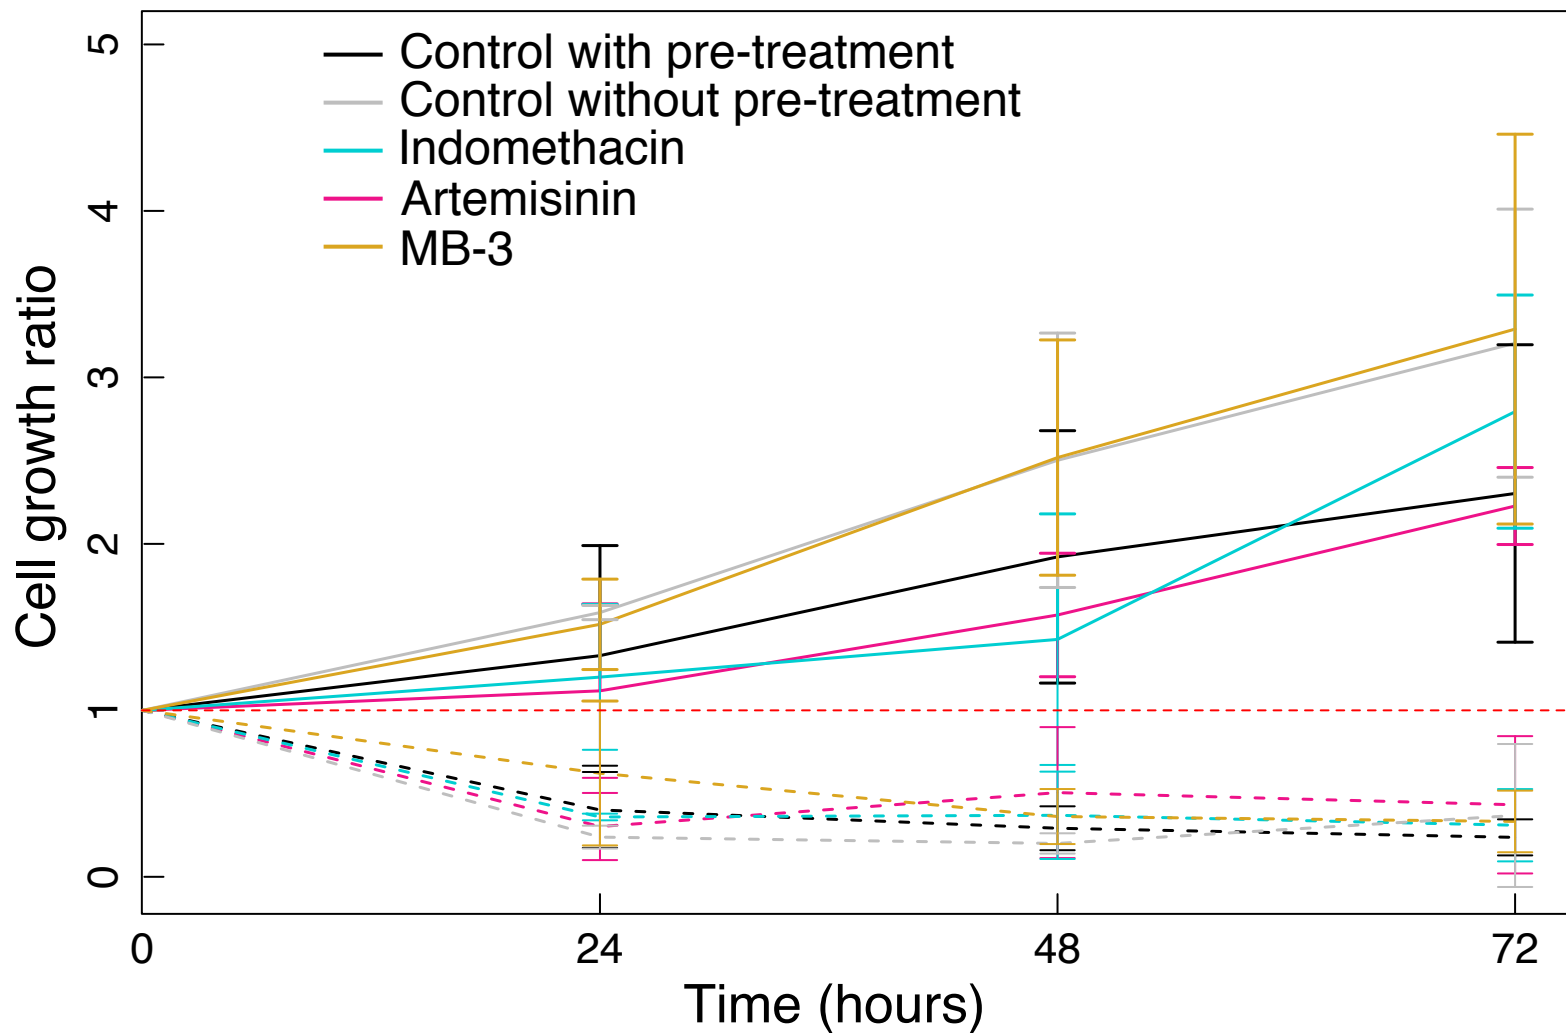

Supplement: S4 (10.1371/journal.pone.0225166.s004) [file journal.pone.0225166.s004]
